# Supplementary material
Source: Springer Nature journal article supplement (https://www.springermedizin.de/resource/supplementary/13019_2010_275_MOESM5_ESM.pdf/9638282)
Supplement: MOESM5 [file 9638282]

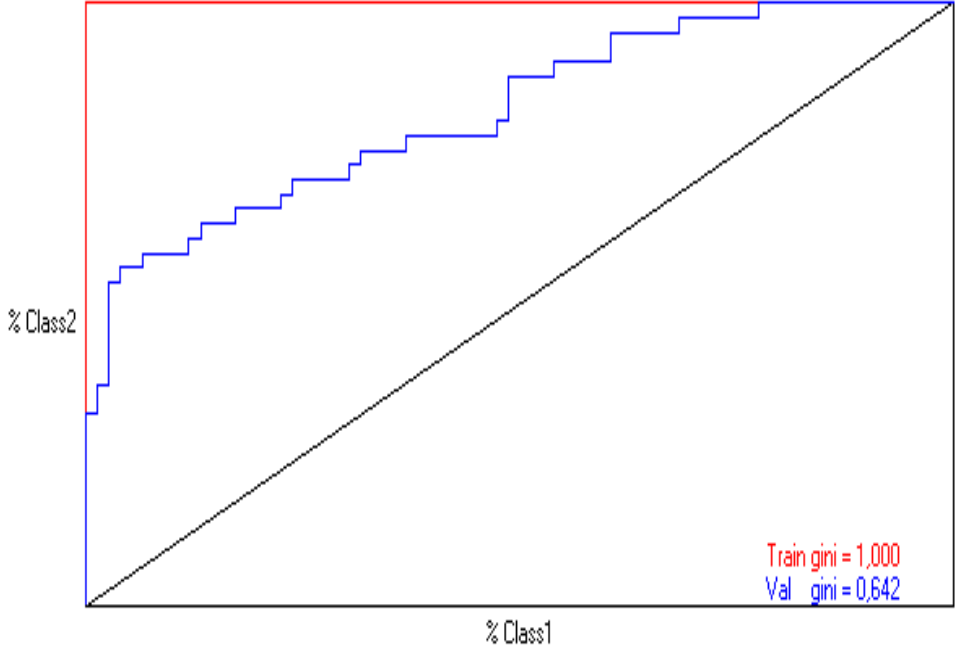

| Variable | Training data | Validation data | Keep |
|----------|---------------|-----------------|------|
| Arc      |               |                 | 1    |
| IRC      |               |                 | 1    |
| dInt1    |               |                 | 1    |
| PoS      |               |                 | 1    |
| dDN2     |               |                 | 1    |
| PoMD     |               |                 | 1    |
| VAB      |               |                 | 1    |
| Cren     |               |                 | 1    |
| dInt2    |               |                 | 1    |
| Cint     |               |                 | 1    |
| PoIp     |               |                 | 1    |
| HP       |               |                 | 1    |
| IscL     |               |                 | 1    |
| HOSP     |               |                 | 1    |
| dPerBr2  |               |                 | 1    |
| Sex      |               |                 | 1    |
| dPerBr1  |               |                 | 1    |
| dInt4    |               |                 | 1    |
| B124     |               |                 | 1    |
| dDN0     |               |                 | 1    |
| Redo     |               |                 | 1    |
| Annint   |               |                 | 1    |
| TCEC     |               |                 | 1    |
| Age      |               |                 | 1    |
| dInt6    |               |                 | 1    |
| dPerBr3  |               |                 | 1    |
| PoDN     |               |                 | 1    |
| Cvvh     |               |                 | 1    |
| dDN1     |               |                 | 1    |
| dInt3    |               |                 | 1    |
| dInt5    |               |                 | 1    |
| PoTOT    |               |                 | 1    |
